# Supplementary material
Source: HighWire-hosted journal article supplement (https://bmjopen.bmj.com/content/15/5/e094613)
Supplement: inline-supplementary-material-2 [file inline-supplementary-material-2.pdf]

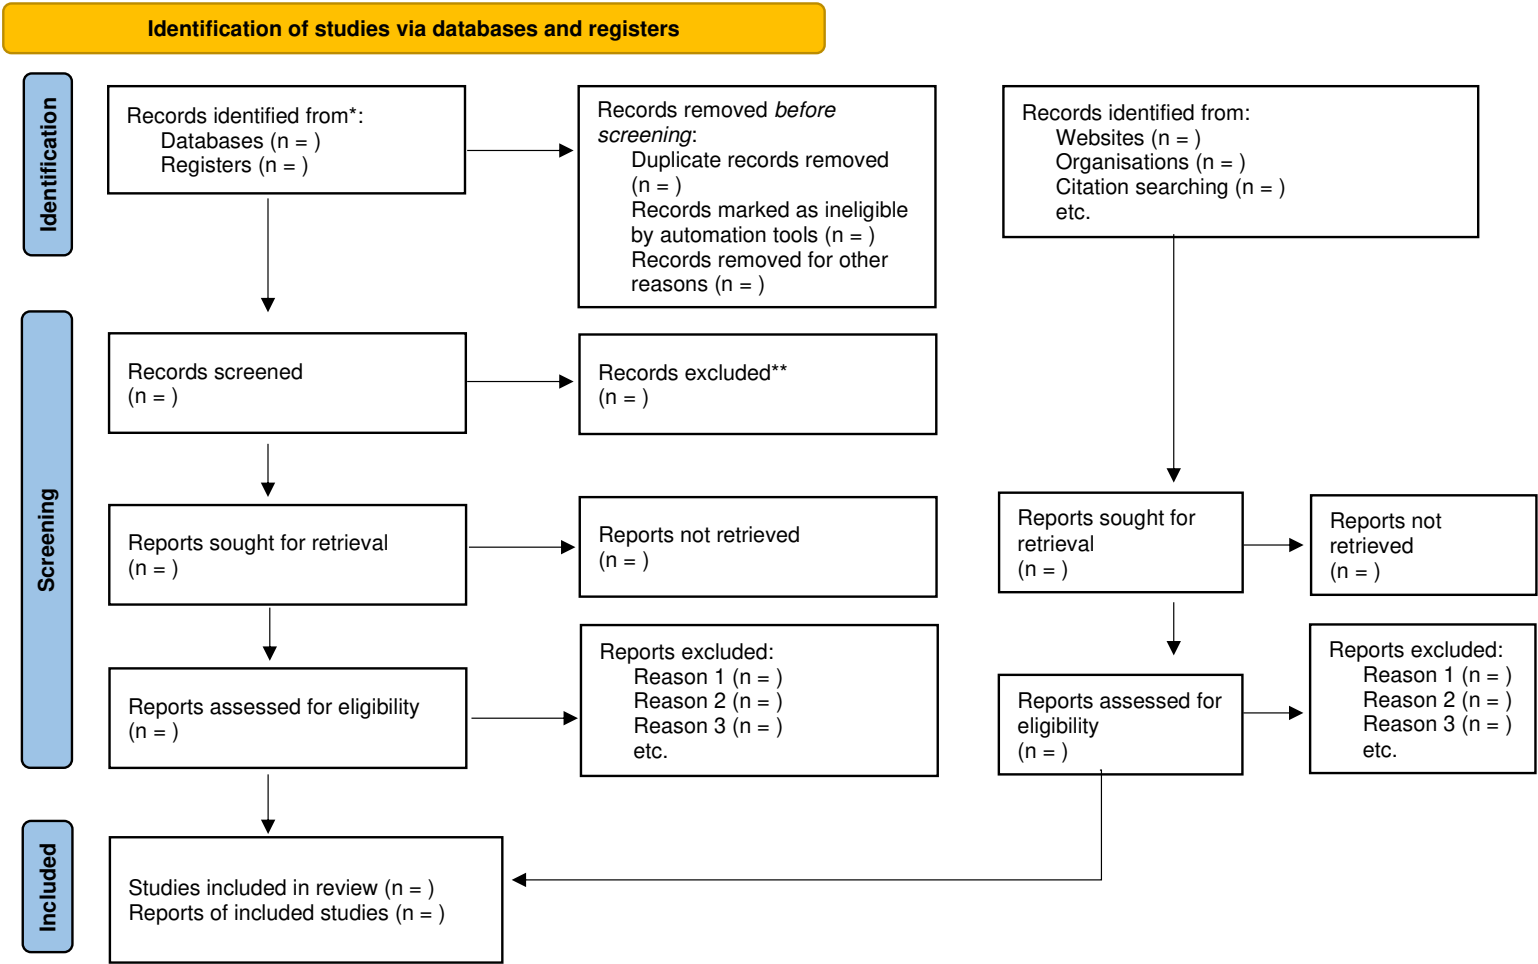

**SUPPLEMENTAL FILE 2** PRISMA-P 2020 Flow Diagram to show studies retrieved from electronic databases and other sources for inclusion and flow to the final stage with studies included in the systematic review
